# Supplementary material for: Recurrent neural networks enable design of multifunctional synthetic human gut microbiome dynamics
Source: eLife. 2022 Jun 23;11:e73870. doi: 10.7554/eLife.73870 (PMC9225007; doi:10.7554/eLife.73870)
Supplement: Supplementary file 1. — Contains two tables. Table S1 summarizes the training/test data and hyperparameters for training each LSTM model. Table S2 contains parameters used for all statistical tests presented in this work. [file elife-73870-supp1.xlsx]

## Sheet: Table S1
Table S1. LSTM Model Train-Test Split and Hyperparameters
Experiment	Train/Test Split	Batch size	Learning rate	Learning rate decay	Decay Interval (epochs)	Total # of epochs	# Neurons per LSTM layer	Nonlinear activation	Input Variable Form	Training Data Description
Figure 1: Abundance prediction on simulated data	≈624/3299	20	0.001	0.5	20	500	512	ReLU	Initial Species Abundance (Z-score)	Ground truth simulations of a 25-species community based on a model from Clark et al., Nature Communications, 2021
Figure 2: Abundance prediction in 12-members experimental community	102/73	10	0.001	0.25	20	250	2048	ReLU	Initial Species Abundance (Z-score)	Experimental communities from Venturelli et al., Molecular Systems Biology, 2018
Figure 3b: Model M1 Metabolite Prediction	415/180	10	0.0005	0.6	15	50 for Butyrate, 70 for Acetate, 50 for Succinate, 40 for Lactate	1024	ReLU	Initial Species Abundance (Z-score)	Same as Model M3 from Clark et al., Nature Communications, 2021
Figure 3b: Model M1 Species Abundance Prediction	415/180	10	0.001	0.5	20	275	2048	ReLU	Initial Species Abundance (Z-score)	Same as Model M3 from Clark et al., Nature Communications, 2021
Figure 3c,d,e: Model M2 Metabolite Prediction	492/103	10	0.001	0.6	15	35 for Butyrate, 70 for Acetate, 40 for Succinate, 50 for Lactate	1024	ReLU	Species Presence/Absence (Binary)	Data from Clark et al., Nature Communications, 2021 combined with 180 community observations from Figure 3 (Random 90% with 10% reserved for cross-validation)
Figure 3c,d,e: Model M2 Species Abundance Prediction	492/103	10	0.003	0.5	20	45	1024	ReLU	Species Presence/Absence (Binary)	Data from Clark et al., Nature Communications, 2021 combined with 180 community observations from Figure 3 (Random 90% with 10% reserved for cross-validation)
Figure 4: Sensitivity analysis	20 K-Fold	10	0.0005	0.6	15	50	512	ReLU	Initial Species Abundance (Z-score)	Data from Clark et al., Nature Communications, 2021 combined with 180 community observations from Figure 3
Figures 5, S1: Species abundance and function prediction in a 25-members community	60/35	10	0.005	0.25	12	200	4096	ReLU	Initial Species Abundance (Z-score)	60 training communities chosen as a subset of the communities designed using model M1, measured at higher time resolution (16, 32, and 48 hr) (see Figure S5a), remaining 34 communities used for validation

## Sheet: Table S2
Table S2. Statistical Test Parameters
Figure 3c Pearson correlations
Target	N	p-value
Butyrate	103	1.20207e-47
Acetate	103	1.914e-40
Succinate	103	5.14994e-25
Lactate	103	5.85556e-38
ER	69	9.31086e-26
FP	71	0.022378
AC	63	4.12693e-23
CC	71	6.56103e-23
RI	70	1.60637e-05
DP	50	4.40106e-19
BH	51	4.87701e-22
CA	51	3.78589e-08
PC	47	3.84259e-23
DL	46	1.05144e-22
CG	48	1.19853e-26
BF	44	6.0284e-29
EL	49	5.42966e-15
CH	48	0.000369585
BO	38	4.0893e-10
BT	42	2.29655e-18
BU	48	1.15217e-17
BV	48	3.31603e-29
BC	49	2.43299e-22
BY	58	1.04533e-23
PJ	43	3.46466e-09
DF	54	1.0312e-13
BL	45	2.13016e-42
BP	47	6.07186e-12
BA	49	7.35829e-07
Figure 3-figure supplement 3a Pearson correlations
	Composite Model		LSTM Model
Target	N	p-value	N	p-value
PC	78	8.3713e-09	78	1.24504e-09
PJ	107	0.00527982	107	6.42734e-09
BV	77	0.0175873	77	8.52795e-05
BF	91	1.5463e-11	91	1.3087e-08
BO	86	2.3659e-06	86	0.000108456
BT	71	2.21112e-12	71	6.07914e-06
BC	91	2.82386e-11	91	5.11963e-12
BY	78	1.64634e-11	78	1.94512e-15
BU	101	0.00790549	101	1.32808e-12
DP	82	0.513625	82	0.000790612
BL	89	1.13345e-10	89	0.000231011
BA	90	1.01411e-06	90	9.44365e-11
BP	78	0.000435494	78	0.00994381
CA	111	0.290275	111	3.64658e-09
EL	114	0.161937	114	0.969262
FP	93	0.396602	93	0.300624
CH	101	5.41244e-07	101	0.000811964
AC	100	0.467994	100	5.85704e-05
BH	104	0.827896	103	0.560026
CG	90	0.099581	90	0.177794
ER	75	0.00290803	75	1.5639e-08
RI	91	0.707014	91	1.2323e-06
CC	66	0.02903	66	0.0105421
DL	73	0.000427854	73	0.00153004	gLV+Random Forest		gLV+FFN
DF	95	8.91161e-10	95	8.77034e-16	N	p-value	N	p-value
Butyrate	180	2.17057e-95	180	4.4078e-90	180	2.36e-55	180	9.88e-41
Acetate	180	1.72428e-27	180	1.78253e-51	180	3.1e-30	180	1.09e-37
Succinate	180	1.962e-16	180	3.77333e-35	180	8.35e-18	180	7.13e-13
Lactate	180	2.50802e-22	180	4.10752e-81	180	2.28e-51	180	4.7e-26
Figure 5 Pearson correlations
Target	N	p-value (t=16hrs)	p-value (t=32hrs)	p-value (t=48hrs)
Red Community Abundance	950	0	0	0
Blue Community Abundance	250	1.36e-101	2.64e-106	4.83e-130
Green Community Abundance	775	4.54e-303	1.34e-305	0
Purple Community Abundance	150	7.08e-43	1.31e-66	1.07e-51
Orange Community Abundance	125	1.02e-57	2.64e-51	4.26e-49
Grey Community Abundance	125	4.35e-53	1.93e-47	9.45e-48
Red Community Butyrate	38	4.55e-05	3.81e-06	2.78e-06
Red Community Acetate	38	0.0063	0.00021	8.58e-06
Red Community Lactate	38	1.61e-08	7.18e-10	3.87e-09
Red Community Succinate	38	1.83e-10	1.33e-14	4.47e-13
Blue Community Butyrate	10	0.716	0.272	0.939
Blue Community Acetate	10	0.0769	0.0074	0.0046
Blue Community Lactate	10	0.0496	0.0937	0.435
Blue Community Succinate	10	0.0326	0.0365	0.0612
Green Community Butyrate	31	0.0249	0.0005	0.0002
Green Community Acetate	31	4.09e-07	0.001	4.69e-06
Green Community Lactate	31	7.33e-05	0.0531	0.0028
Green Community Succinate	31	4.87e-15	3.37e-14	6.93e-15
Purple Community Butyrate	6	0.259	0.685	0.524
Purple Community Acetate	6	0.0028	0.0161	0.138
Purple Community Lactate	6	0.0897	0.228	0.0912
Purple Community Succinate	6	0.0475	0.0846	0.0269
Orange Community Butyrate	5	0.731	0.426	0.415
Orange Community Acetate	5	0.0501	0.008	0.0146
Orange Community Lactate	5	0.353	0.0795	0.148
Orange Community Succinate	5	0.968	0.869	0.413
Grey Community Butyrate	5	0.271	0.572	0.572
Grey Community Acetate	5	0.557	0.456	0.327
Grey Community Lactate	5	0.36	0.665	0.397
Grey Community Succinate	5	0.217	0.322	0.501
Figure 5 Pearson correlations
Target	N	p-value (t=16hrs)	p-value (t=32hrs)	p-value (t=48hrs)
PC	23	7.82e-06	5.93e-07	5.56e-06
PJ	23	1.01e-11	9.15e-14	4.25e-15
BV	15	1.44e-08	2.07e-09	1.49e-07
BF	18	3.52e-15	4.66e-16	5.02e-16
BO	22	1.47e-09	2.39e-08	2.41e-08
BT	13	1.15e-14	1.86e-12	1.04e-11
BC	18	4.46e-20	3.9e-14	1.33e-11
BY	21	4.13e-12	8.19e-12	1.22e-10
BU	21	4.84e-11	2.85e-06	1.91e-05
DP	15	1.5e-06	5.23e-08	2.17e-05
BL	16	5.03e-05	9.21e-07	0.000192
BA	19	4.6e-13	1.1e-10	1.9e-06
BP	13	4.36e-13	2.25e-12	6.94e-12
CA	22	0.000145	2.61e-05	0.000138
EL	17	0.000485	0.00768	0.0263
FP	21	0.00848	0.009	0.00672
CH	21	2.08e-06	4.86e-06	7.5e-10
AC	22	6.2e-09	3.18e-10	8.3e-09
BH	24	6.69e-07	0.00063	3.82e-06
CG	21	8.49e-09	3.15e-13	2.95e-11
ER	17	4.86e-09	8.71e-14	1.21e-12
RI	18	3.7e-11	5.3e-08	1.65e-07
CC	13	1.86e-05	1.66e-08	4.9e-09
DL	18	9.92e-11	1.06e-11	8.14e-10
DF	18	1.82e-07	6.12e-10	6.86e-10
Figure 4d Pearson correlations
Target	Sample Subset	N	p-value
Acetate	PC	261	7.72e-102
Acetate	PC, PJ	153	6.66e-58
Acetate	PC, BV	142	1.23e-50
Acetate	PC, BF	104	9.48e-38
Acetate	PC, BO	129	6.3e-53
Acetate	PC, BT	93	2.14e-33
Acetate	PC, BC	113	3.52e-35
Acetate	PC, BY	98	7.89e-32
Acetate	PC, BU	135	1.5e-45
Acetate	PC, DP	116	1.99e-37
Acetate	PC, BL	125	8.89e-47
Acetate	PC, BA	143	2.91e-45
Acetate	PC, BP	126	9.8e-39
Acetate	PC, CA	143	8.86e-53
Acetate	PC, EL	148	1.57e-59
Acetate	PC, FP	215	2.21e-79
Acetate	PC, CH	138	1.83e-49
Acetate	PC, AC	154	1.57e-48
Acetate	PC, BH	143	3.13e-54
Acetate	PC, CG	134	5.18e-39
Acetate	PC, ER	208	1.15e-80
Acetate	PC, RI	216	1.65e-80
Acetate	PC, CC	202	2.93e-76
Acetate	PC, DL	105	5.87e-30
Acetate	PC, DF	152	6.27e-56
Acetate	PJ	284	2.47e-109
Acetate	PJ, BV	139	1.09e-45
Acetate	PJ, BF	105	1.23e-34
Acetate	PJ, BO	137	2.44e-51
Acetate	PJ, BT	91	1.5e-33
Acetate	PJ, BC	126	1.54e-49
Acetate	PJ, BY	127	5.93e-38
Acetate	PJ, BU	144	6.48e-46
Acetate	PJ, DP	134	1.56e-45
Acetate	PJ, BL	130	8.51e-54
Acetate	PJ, BA	155	4.14e-50
Acetate	PJ, BP	134	3.7e-42
Acetate	PJ, CA	154	6.81e-57
Acetate	PJ, EL	141	5.42e-56
Acetate	PJ, FP	221	6.58e-81
Acetate	PJ, CH	144	3.01e-48
Acetate	PJ, AC	171	1.19e-50
Acetate	PJ, BH	164	3.34e-62
Acetate	PJ, CG	129	2.58e-40
Acetate	PJ, ER	204	1.08e-82
Acetate	PJ, RI	214	3.04e-87
Acetate	PJ, CC	204	1.67e-73
Acetate	PJ, DL	108	6.81e-33
Acetate	PJ, DF	152	1.02e-53
Acetate	BV	263	1.59e-85
Acetate	BV, BF	117	2.05e-34
Acetate	BV, BO	116	2.75e-38
Acetate	BV, BT	102	3.37e-30
Acetate	BV, BC	123	1.62e-40
Acetate	BV, BY	106	8.28e-34
Acetate	BV, BU	136	5.37e-42
Acetate	BV, DP	118	1.33e-33
Acetate	BV, BL	105	1.19e-33
Acetate	BV, BA	140	1.27e-35
Acetate	BV, BP	120	2.85e-29
Acetate	BV, CA	138	6.57e-40
Acetate	BV, EL	140	4.67e-49
Acetate	BV, FP	211	2.73e-70
Acetate	BV, CH	132	6.35e-39
Acetate	BV, AC	154	9.19e-44
Acetate	BV, BH	132	8.98e-39
Acetate	BV, CG	127	6.46e-36
Acetate	BV, ER	207	3.11e-66
Acetate	BV, RI	199	4.14e-63
Acetate	BV, CC	186	1.57e-62
Acetate	BV, DL	101	1.9e-26
Acetate	BV, DF	147	1.15e-44
Acetate	BF	205	2.02e-78
Acetate	BF, BO	91	1.86e-32
Acetate	BF, BT	111	8.61e-40
Acetate	BF, BC	117	2e-42
Acetate	BF, BY	94	2.16e-31
Acetate	BF, BU	112	2.55e-37
Acetate	BF, DP	104	2.03e-31
Acetate	BF, BL	97	3.84e-33
Acetate	BF, BA	114	2.03e-29
Acetate	BF, BP	92	2.37e-27
Acetate	BF, CA	115	4.25e-38
Acetate	BF, EL	117	1.25e-44
Acetate	BF, FP	139	3.85e-47
Acetate	BF, CH	103	4.54e-32
Acetate	BF, AC	113	3.9e-37
Acetate	BF, BH	107	1.91e-32
Acetate	BF, CG	103	3.65e-32
Acetate	BF, ER	131	7.69e-47
Acetate	BF, RI	141	2.82e-47
Acetate	BF, CC	133	2.65e-45
Acetate	BF, DL	104	2.99e-29
Acetate	BF, DF	106	1.5e-33
Acetate	BO	230	3.24e-95
Acetate	BO, BT	83	4.2e-31
Acetate	BO, BC	100	1.42e-39
Acetate	BO, BY	108	1.4e-30
Acetate	BO, BU	114	5.63e-43
Acetate	BO, DP	106	7.7e-35
Acetate	BO, BL	117	2.72e-49
Acetate	BO, BA	124	2.75e-40
Acetate	BO, BP	123	1.06e-43
Acetate	BO, CA	125	1.59e-48
Acetate	BO, EL	135	2.28e-58
Acetate	BO, FP	177	1.96e-63
Acetate	BO, CH	119	8.56e-48
Acetate	BO, AC	150	1.25e-45
Acetate	BO, BH	135	1.92e-52
Acetate	BO, CG	115	9.88e-41
Acetate	BO, ER	167	4.58e-62
Acetate	BO, RI	179	1.92e-66
Acetate	BO, CC	163	7.33e-59
Acetate	BO, DL	104	2.37e-38
Acetate	BO, DF	126	7.16e-48
Acetate	BT	183	3.64e-69
Acetate	BT, BC	112	8.4e-42
Acetate	BT, BY	77	9.45e-27
Acetate	BT, BU	94	2.42e-32
Acetate	BT, DP	83	5.65e-24
Acetate	BT, BL	86	1e-30
Acetate	BT, BA	102	5.26e-28
Acetate	BT, BP	90	7.06e-27
Acetate	BT, CA	95	3.69e-32
Acetate	BT, EL	94	4.54e-36
Acetate	BT, FP	129	6.39e-46
Acetate	BT, CH	85	1.12e-28
Acetate	BT, AC	105	1.73e-35
Acetate	BT, BH	97	2.02e-31
Acetate	BT, CG	86	1.2e-27
Acetate	BT, ER	123	7.17e-48
Acetate	BT, RI	131	3.73e-48
Acetate	BT, CC	128	3.65e-45
Acetate	BT, DL	94	2.63e-26
Acetate	BT, DF	102	1.46e-31
Acetate	BC	227	4.82e-82
Acetate	BC, BY	111	1.34e-38
Acetate	BC, BU	116	7.55e-42
Acetate	BC, DP	122	2.94e-42
Acetate	BC, BL	100	9.63e-36
Acetate	BC, BA	114	9.22e-36
Acetate	BC, BP	112	3.64e-34
Acetate	BC, CA	116	1.27e-45
Acetate	BC, EL	118	1.18e-46
Acetate	BC, FP	167	3.56e-60
Acetate	BC, CH	114	5.45e-37
Acetate	BC, AC	138	3.77e-43
Acetate	BC, BH	118	8.4e-42
Acetate	BC, CG	108	3.42e-32
Acetate	BC, ER	164	7.25e-57
Acetate	BC, RI	173	4.91e-66
Acetate	BC, CC	150	3.09e-51
Acetate	BC, DL	114	4.83e-36
Acetate	BC, DF	124	2.49e-45
Acetate	BY	224	2.09e-19
Acetate	BY, BU	97	6.32e-28
Acetate	BY, DP	109	4.24e-29
Acetate	BY, BL	96	1.57e-22
Acetate	BY, BA	118	3.95e-23
Acetate	BY, BP	110	4.11e-22
Acetate	BY, CA	112	1.14e-36
Acetate	BY, EL	104	7.3e-36
Acetate	BY, FP	163	1.06e-46
Acetate	BY, CH	110	9.02e-33
Acetate	BY, AC	145	5.8e-11
Acetate	BY, BH	127	3.43e-37
Acetate	BY, CG	109	4.08e-35
Acetate	BY, ER	160	2.65e-41
Acetate	BY, RI	156	3.84e-24
Acetate	BY, CC	152	6.02e-50
Acetate	BY, DL	97	1.77e-26
Acetate	BY, DF	114	2.64e-35
Acetate	BU	243	7.63e-36
Acetate	BU, DP	115	2.67e-29
Acetate	BU, BL	110	6.89e-42
Acetate	BU, BA	132	2.82e-41
Acetate	BU, BP	117	1.18e-36
Acetate	BU, CA	145	1.42e-50
Acetate	BU, EL	151	2.36e-55
Acetate	BU, FP	183	8.18e-58
Acetate	BU, CH	129	7.08e-40
Acetate	BU, AC	124	3.85e-32
Acetate	BU, BH	130	2.29e-43
Acetate	BU, CG	133	5.01e-42
Acetate	BU, ER	162	2.66e-56
Acetate	BU, RI	184	6.39e-22
Acetate	BU, CC	160	2.72e-49
Acetate	BU, DL	102	2.9e-30
Acetate	BU, DF	145	7.04e-52
Acetate	DP	242	5.96e-82
Acetate	DP, BL	113	3.64e-40
Acetate	DP, BA	122	2.85e-32
Acetate	DP, BP	119	3.41e-36
Acetate	DP, CA	125	4.12e-38
Acetate	DP, EL	119	1.23e-41
Acetate	DP, FP	182	6.05e-61
Acetate	DP, CH	118	9.01e-38
Acetate	DP, AC	132	1.01e-35
Acetate	DP, BH	133	7.4e-44
Acetate	DP, CG	104	1.31e-30
Acetate	DP, ER	172	2.43e-59
Acetate	DP, RI	185	1.26e-57
Acetate	DP, CC	176	1.82e-53
Acetate	DP, DL	109	5.28e-31
Acetate	DP, DF	133	8.52e-45
Acetate	BL	236	1.98e-87
Acetate	BL, BA	126	3.4e-40
Acetate	BL, BP	105	1.45e-33
Acetate	BL, CA	131	4.23e-50
Acetate	BL, EL	130	2.97e-55
Acetate	BL, FP	177	3.12e-60
Acetate	BL, CH	126	9.22e-46
Acetate	BL, AC	150	1.41e-50
Acetate	BL, BH	127	1.09e-48
Acetate	BL, CG	113	4.34e-38
Acetate	BL, ER	160	1.64e-67
Acetate	BL, RI	174	1.69e-73
Acetate	BL, CC	167	3.62e-69
Acetate	BL, DL	91	3.38e-33
Acetate	BL, DF	128	8.05e-47
Acetate	BA	289	3.47e-89
Acetate	BA, BP	149	2.44e-40
Acetate	BA, CA	159	6.11e-54
Acetate	BA, EL	145	7.15e-55
Acetate	BA, FP	223	1.83e-67
Acetate	BA, CH	140	2.12e-45
Acetate	BA, AC	169	1.36e-46
Acetate	BA, BH	140	3.05e-47
Acetate	BA, CG	136	3.92e-44
Acetate	BA, ER	210	4.02e-65
Acetate	BA, RI	218	1.53e-72
Acetate	BA, CC	213	8.89e-65
Acetate	BA, DL	123	2e-32
Acetate	BA, DF	174	7.61e-58
Acetate	BP	241	1.54e-70
Acetate	BP, CA	138	7.11e-47
Acetate	BP, EL	127	2.52e-47
Acetate	BP, FP	190	9.07e-51
Acetate	BP, CH	110	2.32e-39
Acetate	BP, AC	149	3.38e-25
Acetate	BP, BH	129	5.12e-42
Acetate	BP, CG	130	1.46e-40
Acetate	BP, ER	185	1.64e-58
Acetate	BP, RI	191	3.71e-61
Acetate	BP, CC	180	8.13e-53
Acetate	BP, DL	116	3.73e-33
Acetate	BP, DF	144	1.69e-47
Acetate	CA	275	5.37e-100
Acetate	CA, EL	153	1.16e-61
Acetate	CA, FP	206	1.5e-72
Acetate	CA, CH	146	8.9e-50
Acetate	CA, AC	155	5.9e-36
Acetate	CA, BH	158	6.64e-59
Acetate	CA, CG	126	6.49e-43
Acetate	CA, ER	199	3e-79
Acetate	CA, RI	209	2.85e-80
Acetate	CA, CC	191	1.4e-70
Acetate	CA, DL	106	7.61e-32
Acetate	CA, DF	161	1.57e-58
Acetate	EL	272	3.08e-111
Acetate	EL, FP	209	1.6e-78
Acetate	EL, CH	139	1.46e-52
Acetate	EL, AC	155	2.93e-50
Acetate	EL, BH	143	5.91e-56
Acetate	EL, CG	130	9.34e-40
Acetate	EL, ER	196	4.87e-79
Acetate	EL, RI	204	6.84e-82
Acetate	EL, CC	179	3.97e-66
Acetate	EL, DL	108	3.92e-38
Acetate	EL, DF	155	2.52e-57
Acetate	FP	478	9.5e-166
Acetate	FP, CH	188	4.98e-60
Acetate	FP, AC	283	5.75e-91
Acetate	FP, BH	213	9.68e-72
Acetate	FP, CG	179	1.13e-59
Acetate	FP, ER	363	2.31e-133
Acetate	FP, RI	358	1.21e-132
Acetate	FP, CC	350	1.25e-128
Acetate	FP, DL	158	1.73e-46
Acetate	FP, DF	234	1.37e-79
Acetate	CH	259	1.06e-90
Acetate	CH, AC	157	2.92e-41
Acetate	CH, BH	133	2.89e-44
Acetate	CH, CG	123	5.51e-39
Acetate	CH, ER	175	5.15e-58
Acetate	CH, RI	196	7.3e-65
Acetate	CH, CC	174	9.99e-56
Acetate	CH, DL	97	1.83e-30
Acetate	CH, DF	148	1.05e-44
Acetate	AC	397	8.69e-73
Acetate	AC, BH	168	1.74e-56
Acetate	AC, CG	150	1.06e-44
Acetate	AC, ER	273	1.45e-85
Acetate	AC, RI	277	6.41e-86
Acetate	AC, CC	266	6.05e-83
Acetate	AC, DL	123	3.62e-28
Acetate	AC, DF	173	1.02e-50
Acetate	BH	288	4.09e-102
Acetate	BH, CG	136	1.35e-46
Acetate	BH, ER	201	4.18e-71
Acetate	BH, RI	216	6.62e-82
Acetate	BH, CC	195	1.43e-73
Acetate	BH, DL	112	1.28e-33
Acetate	BH, DF	145	4.64e-47
Acetate	CG	248	1.3e-87
Acetate	CG, ER	171	2.8e-60
Acetate	CG, RI	176	8.41e-60
Acetate	CG, CC	174	2.09e-61
Acetate	CG, DL	100	3.79e-32
Acetate	CG, DF	133	2.11e-43
Acetate	ER	462	7.81e-156
Acetate	ER, RI	353	7.45e-134
Acetate	ER, CC	346	6.6e-126
Acetate	ER, DL	151	1.77e-45
Acetate	ER, DF	219	3.72e-81
Acetate	RI	469	4.29e-97
Acetate	RI, CC	353	9.07e-126
Acetate	RI, DL	155	2e-49
Acetate	RI, DF	223	2.19e-79
Acetate	CC	457	2.01e-164
Acetate	CC, DL	153	1.46e-44
Acetate	CC, DF	216	9.84e-76
Acetate	DL	206	6.13e-66
Acetate	DL, DF	113	4.37e-34
Acetate	DF	291	1.62e-108
Butyrate	PC	261	3.84e-145
Butyrate	PC, PJ	153	4.12e-84
Butyrate	PC, BV	142	4.83e-74
Butyrate	PC, BF	104	1.96e-51
Butyrate	PC, BO	129	4.22e-67
Butyrate	PC, BT	93	3.28e-49
Butyrate	PC, BC	113	4.39e-59
Butyrate	PC, BY	98	7.18e-51
Butyrate	PC, BU	135	4.11e-71
Butyrate	PC, DP	116	2.95e-49
Butyrate	PC, BL	125	3.45e-65
Butyrate	PC, BA	143	2.38e-79
Butyrate	PC, BP	126	8.37e-61
Butyrate	PC, CA	143	3.14e-77
Butyrate	PC, EL	148	3.5e-79
Butyrate	PC, FP	215	3.55e-116
Butyrate	PC, CH	138	5.26e-70
Butyrate	PC, AC	154	3.91e-52
Butyrate	PC, BH	143	1.99e-79
Butyrate	PC, CG	134	5.09e-70
Butyrate	PC, ER	208	3.6e-111
Butyrate	PC, RI	216	1.58e-120
Butyrate	PC, CC	202	2.72e-109
Butyrate	PC, DL	105	4.73e-48
Butyrate	PC, DF	152	3.7e-84
Butyrate	PJ	284	3.51e-152
Butyrate	PJ, BV	139	2.96e-72
Butyrate	PJ, BF	105	1.5e-50
Butyrate	PJ, BO	137	2.21e-68
Butyrate	PJ, BT	91	7.07e-45
Butyrate	PJ, BC	126	2.94e-66
Butyrate	PJ, BY	127	1.35e-65
Butyrate	PJ, BU	144	1.22e-74
Butyrate	PJ, DP	134	4.52e-56
Butyrate	PJ, BL	130	1.56e-72
Butyrate	PJ, BA	155	1.34e-84
Butyrate	PJ, BP	134	3.9e-70
Butyrate	PJ, CA	154	1.8e-87
Butyrate	PJ, EL	141	9.23e-77
Butyrate	PJ, FP	221	3.4e-121
Butyrate	PJ, CH	144	6.76e-77
Butyrate	PJ, AC	171	3.89e-60
Butyrate	PJ, BH	164	3.46e-88
Butyrate	PJ, CG	129	5.63e-67
Butyrate	PJ, ER	204	2.52e-110
Butyrate	PJ, RI	214	1.32e-121
Butyrate	PJ, CC	204	2.53e-108
Butyrate	PJ, DL	108	1.83e-47
Butyrate	PJ, DF	152	1.49e-85
Butyrate	BV	263	3.71e-140
Butyrate	BV, BF	117	3.71e-57
Butyrate	BV, BO	116	1.04e-57
Butyrate	BV, BT	102	6.98e-52
Butyrate	BV, BC	123	6.02e-60
Butyrate	BV, BY	106	1.86e-51
Butyrate	BV, BU	136	1.6e-69
Butyrate	BV, DP	118	2.37e-48
Butyrate	BV, BL	105	2.05e-48
Butyrate	BV, BA	140	9.75e-80
Butyrate	BV, BP	120	2.67e-56
Butyrate	BV, CA	138	5.65e-73
Butyrate	BV, EL	140	1.47e-69
Butyrate	BV, FP	211	4.04e-109
Butyrate	BV, CH	132	4.07e-65
Butyrate	BV, AC	154	2.33e-47
Butyrate	BV, BH	132	1.52e-69
Butyrate	BV, CG	127	1.24e-61
Butyrate	BV, ER	207	7.35e-109
Butyrate	BV, RI	199	2e-107
Butyrate	BV, CC	186	5.43e-95
Butyrate	BV, DL	101	2.97e-47
Butyrate	BV, DF	147	1.46e-77
Butyrate	BF	205	1.31e-105
Butyrate	BF, BO	91	4.12e-43
Butyrate	BF, BT	111	1.84e-59
Butyrate	BF, BC	117	1.47e-58
Butyrate	BF, BY	94	1.17e-46
Butyrate	BF, BU	112	9.71e-56
Butyrate	BF, DP	104	8.63e-43
Butyrate	BF, BL	97	3.95e-43
Butyrate	BF, BA	114	3.24e-50
Butyrate	BF, BP	92	2.24e-44
Butyrate	BF, CA	115	7.88e-59
Butyrate	BF, EL	117	1.2e-59
Butyrate	BF, FP	139	7.95e-70
Butyrate	BF, CH	103	3.13e-49
Butyrate	BF, AC	113	7.39e-34
Butyrate	BF, BH	107	1.71e-51
Butyrate	BF, CG	103	6.69e-53
Butyrate	BF, ER	131	5.63e-67
Butyrate	BF, RI	141	5.05e-76
Butyrate	BF, CC	133	9.87e-64
Butyrate	BF, DL	104	2.87e-45
Butyrate	BF, DF	106	9.26e-52
Butyrate	BO	230	2.07e-122
Butyrate	BO, BT	83	1.04e-41
Butyrate	BO, BC	100	6.38e-48
Butyrate	BO, BY	108	1.24e-51
Butyrate	BO, BU	114	2.57e-56
Butyrate	BO, DP	106	1.2e-43
Butyrate	BO, BL	117	5.85e-61
Butyrate	BO, BA	124	2.45e-64
Butyrate	BO, BP	123	1.81e-65
Butyrate	BO, CA	125	8.78e-68
Butyrate	BO, EL	135	1.96e-73
Butyrate	BO, FP	177	2.03e-89
Butyrate	BO, CH	119	2.51e-61
Butyrate	BO, AC	150	8.59e-50
Butyrate	BO, BH	135	5.01e-70
Butyrate	BO, CG	115	3.19e-56
Butyrate	BO, ER	167	5.72e-84
Butyrate	BO, RI	179	5.05e-95
Butyrate	BO, CC	163	2.23e-81
Butyrate	BO, DL	104	2.01e-47
Butyrate	BO, DF	126	6.03e-65
Butyrate	BT	183	2e-103
Butyrate	BT, BC	112	1.11e-60
Butyrate	BT, BY	77	2.3e-35
Butyrate	BT, BU	94	2.58e-49
Butyrate	BT, DP	83	3.26e-34
Butyrate	BT, BL	86	1.03e-39
Butyrate	BT, BA	102	3.28e-54
Butyrate	BT, BP	90	6.72e-46
Butyrate	BT, CA	95	7.17e-52
Butyrate	BT, EL	94	1.39e-50
Butyrate	BT, FP	129	4.95e-71
Butyrate	BT, CH	85	3.48e-42
Butyrate	BT, AC	105	1.05e-36
Butyrate	BT, BH	97	1.38e-48
Butyrate	BT, CG	86	3.34e-40
Butyrate	BT, ER	123	8.26e-66
Butyrate	BT, RI	131	6.5e-71
Butyrate	BT, CC	128	1.17e-66
Butyrate	BT, DL	94	1.43e-45
Butyrate	BT, DF	102	2.34e-53
Butyrate	BC	227	5e-124
Butyrate	BC, BY	111	4.66e-56
Butyrate	BC, BU	116	2.01e-62
Butyrate	BC, DP	122	2.09e-54
Butyrate	BC, BL	100	1.96e-47
Butyrate	BC, BA	114	4.59e-60
Butyrate	BC, BP	112	8.22e-55
Butyrate	BC, CA	116	9.67e-64
Butyrate	BC, EL	118	1.81e-62
Butyrate	BC, FP	167	7.49e-89
Butyrate	BC, CH	114	1.13e-57
Butyrate	BC, AC	138	6.68e-48
Butyrate	BC, BH	118	8.32e-57
Butyrate	BC, CG	108	2.03e-51
Butyrate	BC, ER	164	2.18e-87
Butyrate	BC, RI	173	1.87e-92
Butyrate	BC, CC	150	1.07e-78
Butyrate	BC, DL	114	1.4e-55
Butyrate	BC, DF	124	9.18e-67
Butyrate	BY	224	3.69e-111
Butyrate	BY, BU	97	3.26e-49
Butyrate	BY, DP	109	3.13e-42
Butyrate	BY, BL	96	8.44e-43
Butyrate	BY, BA	118	1.08e-61
Butyrate	BY, BP	110	5.77e-53
Butyrate	BY, CA	112	3.26e-58
Butyrate	BY, EL	104	2.17e-55
Butyrate	BY, FP	163	1e-81
Butyrate	BY, CH	110	2.74e-55
Butyrate	BY, AC	145	2.29e-50
Butyrate	BY, BH	127	2.42e-60
Butyrate	BY, CG	109	3.24e-53
Butyrate	BY, ER	160	1.1e-78
Butyrate	BY, RI	156	3.02e-79
Butyrate	BY, CC	152	5.19e-71
Butyrate	BY, DL	97	3.74e-44
Butyrate	BY, DF	114	8.56e-59
Butyrate	BU	243	7.24e-130
Butyrate	BU, DP	115	4.63e-46
Butyrate	BU, BL	110	2e-57
Butyrate	BU, BA	132	3.35e-72
Butyrate	BU, BP	117	1.4e-61
Butyrate	BU, CA	145	2.26e-78
Butyrate	BU, EL	151	3.8e-79
Butyrate	BU, FP	183	1.54e-99
Butyrate	BU, CH	129	4.47e-68
Butyrate	BU, AC	124	1.36e-41
Butyrate	BU, BH	130	1.57e-66
Butyrate	BU, CG	133	1.5e-70
Butyrate	BU, ER	162	3.45e-85
Butyrate	BU, RI	184	1.87e-99
Butyrate	BU, CC	160	1.65e-81
Butyrate	BU, DL	102	2.45e-48
Butyrate	BU, DF	145	1.15e-83
Butyrate	DP	242	5.23e-91
Butyrate	DP, BL	113	1.29e-48
Butyrate	DP, BA	122	2.76e-51
Butyrate	DP, BP	119	5.15e-49
Butyrate	DP, CA	125	1.02e-53
Butyrate	DP, EL	119	1.27e-48
Butyrate	DP, FP	182	3.12e-69
Butyrate	DP, CH	118	2.04e-46
Butyrate	DP, AC	132	8.98e-26
Butyrate	DP, BH	133	1.45e-54
Butyrate	DP, CG	104	6.04e-41
Butyrate	DP, ER	172	2.93e-65
Butyrate	DP, RI	185	2.8e-77
Butyrate	DP, CC	176	3.59e-70
Butyrate	DP, DL	109	6.33e-42
Butyrate	DP, DF	133	4.3e-55
Butyrate	BL	236	1.21e-126
Butyrate	BL, BA	126	4.01e-68
Butyrate	BL, BP	105	1.66e-51
Butyrate	BL, CA	131	7.7e-74
Butyrate	BL, EL	130	1.87e-72
Butyrate	BL, FP	177	2.3e-95
Butyrate	BL, CH	126	1.02e-67
Butyrate	BL, AC	150	2.46e-51
Butyrate	BL, BH	127	3.4e-73
Butyrate	BL, CG	113	3.29e-55
Butyrate	BL, ER	160	4.35e-83
Butyrate	BL, RI	174	1.45e-93
Butyrate	BL, CC	167	9.63e-84
Butyrate	BL, DL	91	4.32e-45
Butyrate	BL, DF	128	9.08e-68
Butyrate	BA	289	9.25e-161
Butyrate	BA, BP	149	7.92e-75
Butyrate	BA, CA	159	3.26e-88
Butyrate	BA, EL	145	2.15e-80
Butyrate	BA, FP	223	4.12e-128
Butyrate	BA, CH	140	4.82e-72
Butyrate	BA, AC	169	1.87e-54
Butyrate	BA, BH	140	2.39e-75
Butyrate	BA, CG	136	7.85e-74
Butyrate	BA, ER	210	3.17e-119
Butyrate	BA, RI	218	4.22e-126
Butyrate	BA, CC	213	5.82e-116
Butyrate	BA, DL	123	2.61e-56
Butyrate	BA, DF	174	1.42e-97
Butyrate	BP	241	6.21e-125
Butyrate	BP, CA	138	1.71e-69
Butyrate	BP, EL	127	8.33e-65
Butyrate	BP, FP	190	4.68e-95
Butyrate	BP, CH	110	5.01e-52
Butyrate	BP, AC	149	3.13e-45
Butyrate	BP, BH	129	8.26e-65
Butyrate	BP, CG	130	2.96e-66
Butyrate	BP, ER	185	2.2e-90
Butyrate	BP, RI	191	1.02e-96
Butyrate	BP, CC	180	6.75e-87
Butyrate	BP, DL	116	2.49e-51
Butyrate	BP, DF	144	8.11e-78
Butyrate	CA	275	3.43e-145
Butyrate	CA, EL	153	1.45e-81
Butyrate	CA, FP	206	1.56e-112
Butyrate	CA, CH	146	9.12e-76
Butyrate	CA, AC	155	2.68e-51
Butyrate	CA, BH	158	2.3e-87
Butyrate	CA, CG	126	6.57e-69
Butyrate	CA, ER	199	1.52e-107
Butyrate	CA, RI	209	6.18e-113
Butyrate	CA, CC	191	2.7e-104
Butyrate	CA, DL	106	2.16e-49
Butyrate	CA, DF	161	1.2e-88
Butyrate	EL	272	7.53e-144
Butyrate	EL, FP	209	2.8e-112
Butyrate	EL, CH	139	5.47e-72
Butyrate	EL, AC	155	2.19e-50
Butyrate	EL, BH	143	3.44e-78
Butyrate	EL, CG	130	1.38e-67
Butyrate	EL, ER	196	1.5e-103
Butyrate	EL, RI	204	1.02e-108
Butyrate	EL, CC	179	7.2e-94
Butyrate	EL, DL	108	8.55e-54
Butyrate	EL, DF	155	1.13e-83
Butyrate	FP	478	1.43e-247
Butyrate	FP, CH	188	2.39e-93
Butyrate	FP, AC	283	7.29e-86
Butyrate	FP, BH	213	4.58e-113
Butyrate	FP, CG	179	1.25e-91
Butyrate	FP, ER	363	1.41e-182
Butyrate	FP, RI	358	2.77e-187
Butyrate	FP, CC	350	5.14e-177
Butyrate	FP, DL	158	2.51e-78
Butyrate	FP, DF	234	5.01e-130
Butyrate	CH	259	3.62e-127
Butyrate	CH, AC	157	9.21e-49
Butyrate	CH, BH	133	5.34e-68
Butyrate	CH, CG	123	4.87e-66
Butyrate	CH, ER	175	3.29e-83
Butyrate	CH, RI	196	3.58e-98
Butyrate	CH, CC	174	1.62e-83
Butyrate	CH, DL	97	5.93e-43
Butyrate	CH, DF	148	3.68e-77
Butyrate	AC	397	1.92e-109
Butyrate	AC, BH	168	1.88e-58
Butyrate	AC, CG	150	2.51e-45
Butyrate	AC, ER	273	2.98e-85
Butyrate	AC, RI	277	5.07e-87
Butyrate	AC, CC	266	6.22e-80
Butyrate	AC, DL	123	3.68e-37
Butyrate	AC, DF	173	3.01e-57
Butyrate	BH	288	3.6e-146
Butyrate	BH, CG	136	1.54e-67
Butyrate	BH, ER	201	1.3e-102
Butyrate	BH, RI	216	2.04e-118
Butyrate	BH, CC	195	2.96e-103
Butyrate	BH, DL	112	8.86e-48
Butyrate	BH, DF	145	6.52e-75
Butyrate	CG	248	1.97e-125
Butyrate	CG, ER	171	2.61e-81
Butyrate	CG, RI	176	1.02e-86
Butyrate	CG, CC	174	1.14e-82
Butyrate	CG, DL	100	3e-45
Butyrate	CG, DF	133	5.08e-70
Butyrate	ER	462	4.12e-229
Butyrate	ER, RI	353	1.5e-185
Butyrate	ER, CC	346	3.21e-179
Butyrate	ER, DL	151	2.25e-72
Butyrate	ER, DF	219	3.48e-117
Butyrate	RI	469	2.15e-233
Butyrate	RI, CC	353	1.33e-181
Butyrate	RI, DL	155	1.74e-79
Butyrate	RI, DF	223	3.16e-123
Butyrate	CC	457	1.96e-226
Butyrate	CC, DL	153	5.94e-72
Butyrate	CC, DF	216	3.68e-114
Butyrate	DL	206	6.16e-102
Butyrate	DL, DF	113	3.05e-55
Butyrate	DF	291	2.95e-159
Lactate	PC	261	4.35e-122
Lactate	PC, PJ	153	1.87e-73
Lactate	PC, BV	142	2.75e-68
Lactate	PC, BF	104	2.41e-52
Lactate	PC, BO	129	2.42e-60
Lactate	PC, BT	93	6.62e-45
Lactate	PC, BC	113	1.26e-49
Lactate	PC, BY	98	7.95e-44
Lactate	PC, BU	135	3.86e-63
Lactate	PC, DP	116	5.19e-36
Lactate	PC, BL	125	3.12e-55
Lactate	PC, BA	143	3.05e-63
Lactate	PC, BP	126	9.4e-47
Lactate	PC, CA	143	2.05e-69
Lactate	PC, EL	148	8.52e-70
Lactate	PC, FP	215	9.93e-97
Lactate	PC, CH	138	7.56e-65
Lactate	PC, AC	154	6.17e-57
Lactate	PC, BH	143	9.15e-65
Lactate	PC, CG	134	1.86e-59
Lactate	PC, ER	208	1.6e-95
Lactate	PC, RI	216	3.49e-99
Lactate	PC, CC	202	5.02e-85
Lactate	PC, DL	105	2.79e-38
Lactate	PC, DF	152	7.3e-69
Lactate	PJ	284	2.86e-127
Lactate	PJ, BV	139	2.33e-68
Lactate	PJ, BF	105	6.38e-49
Lactate	PJ, BO	137	1.24e-64
Lactate	PJ, BT	91	7.99e-46
Lactate	PJ, BC	126	6.14e-64
Lactate	PJ, BY	127	1.88e-59
Lactate	PJ, BU	144	1.23e-68
Lactate	PJ, DP	134	7.32e-43
Lactate	PJ, BL	130	8.43e-64
Lactate	PJ, BA	155	6.19e-72
Lactate	PJ, BP	134	1.96e-56
Lactate	PJ, CA	154	9.2e-81
Lactate	PJ, EL	141	9e-64
Lactate	PJ, FP	221	8.52e-97
Lactate	PJ, CH	144	1.62e-73
Lactate	PJ, AC	171	2.99e-65
Lactate	PJ, BH	164	2.07e-74
Lactate	PJ, CG	129	1.76e-62
Lactate	PJ, ER	204	6.02e-97
Lactate	PJ, RI	214	5.57e-105
Lactate	PJ, CC	204	1.23e-87
Lactate	PJ, DL	108	2.54e-39
Lactate	PJ, DF	152	1.37e-68
Lactate	BV	263	4.13e-120
Lactate	BV, BF	117	4.29e-58
Lactate	BV, BO	116	1.71e-54
Lactate	BV, BT	102	1.79e-48
Lactate	BV, BC	123	2.49e-61
Lactate	BV, BY	106	1.94e-49
Lactate	BV, BU	136	2.75e-61
Lactate	BV, DP	118	1.13e-38
Lactate	BV, BL	105	3.72e-44
Lactate	BV, BA	140	2.2e-60
Lactate	BV, BP	120	1.25e-43
Lactate	BV, CA	138	1.79e-63
Lactate	BV, EL	140	3.84e-61
Lactate	BV, FP	211	6.46e-98
Lactate	BV, CH	132	6.5e-63
Lactate	BV, AC	154	9.43e-60
Lactate	BV, BH	132	2.07e-63
Lactate	BV, CG	127	6.85e-55
Lactate	BV, ER	207	1.4e-93
Lactate	BV, RI	199	6.31e-93
Lactate	BV, CC	186	1.94e-80
Lactate	BV, DL	101	6.68e-41
Lactate	BV, DF	147	1.03e-70
Lactate	BF	205	1.74e-97
Lactate	BF, BO	91	7.14e-40
Lactate	BF, BT	111	3.94e-57
Lactate	BF, BC	117	7.49e-54
Lactate	BF, BY	94	1.01e-43
Lactate	BF, BU	112	2.7e-51
Lactate	BF, DP	104	9.76e-38
Lactate	BF, BL	97	8.4e-45
Lactate	BF, BA	114	5.15e-37
Lactate	BF, BP	92	4.74e-38
Lactate	BF, CA	115	3.61e-53
Lactate	BF, EL	117	8.75e-57
Lactate	BF, FP	139	7.12e-71
Lactate	BF, CH	103	3.3e-48
Lactate	BF, AC	113	2.84e-42
Lactate	BF, BH	107	5.51e-45
Lactate	BF, CG	103	7.7e-53
Lactate	BF, ER	131	2.04e-65
Lactate	BF, RI	141	1.8e-71
Lactate	BF, CC	133	9.05e-60
Lactate	BF, DL	104	2.45e-34
Lactate	BF, DF	106	1.46e-49
Lactate	BO	230	2.06e-109
Lactate	BO, BT	83	3.56e-41
Lactate	BO, BC	100	2.58e-49
Lactate	BO, BY	108	5e-50
Lactate	BO, BU	114	1.1e-53
Lactate	BO, DP	106	2.89e-33
Lactate	BO, BL	117	1.47e-54
Lactate	BO, BA	124	9.01e-50
Lactate	BO, BP	123	1.1e-51
Lactate	BO, CA	125	1.84e-63
Lactate	BO, EL	135	1.44e-65
Lactate	BO, FP	177	4.44e-80
Lactate	BO, CH	119	3.78e-57
Lactate	BO, AC	150	4.07e-58
Lactate	BO, BH	135	1.06e-59
Lactate	BO, CG	115	5.1e-52
Lactate	BO, ER	167	3.72e-75
Lactate	BO, RI	179	1.04e-81
Lactate	BO, CC	163	3.13e-66
Lactate	BO, DL	104	3.25e-40
Lactate	BO, DF	126	3.44e-59
Lactate	BT	183	4.5e-91
Lactate	BT, BC	112	5.19e-55
Lactate	BT, BY	77	2.65e-34
Lactate	BT, BU	94	1.8e-48
Lactate	BT, DP	83	1.49e-28
Lactate	BT, BL	86	2.94e-38
Lactate	BT, BA	102	1.64e-44
Lactate	BT, BP	90	2.14e-39
Lactate	BT, CA	95	1.17e-48
Lactate	BT, EL	94	3.06e-50
Lactate	BT, FP	129	1.35e-61
Lactate	BT, CH	85	8.05e-41
Lactate	BT, AC	105	1.37e-41
Lactate	BT, BH	97	1.41e-40
Lactate	BT, CG	86	4.29e-44
Lactate	BT, ER	123	6.29e-62
Lactate	BT, RI	131	1.8e-64
Lactate	BT, CC	128	2.68e-57
Lactate	BT, DL	94	3.14e-36
Lactate	BT, DF	102	1.32e-48
Lactate	BC	227	1.21e-109
Lactate	BC, BY	111	2.79e-55
Lactate	BC, BU	116	2.66e-59
Lactate	BC, DP	122	5e-43
Lactate	BC, BL	100	1.11e-43
Lactate	BC, BA	114	9.19e-51
Lactate	BC, BP	112	2.33e-44
Lactate	BC, CA	116	2.19e-59
Lactate	BC, EL	118	6.5e-59
Lactate	BC, FP	167	5.69e-82
Lactate	BC, CH	114	4.33e-54
Lactate	BC, AC	138	8.87e-55
Lactate	BC, BH	118	1.53e-49
Lactate	BC, CG	108	4.22e-55
Lactate	BC, ER	164	1.6e-80
Lactate	BC, RI	173	7.68e-83
Lactate	BC, CC	150	1.5e-67
Lactate	BC, DL	114	2.12e-46
Lactate	BC, DF	124	7.89e-61
Lactate	BY	224	5.59e-99
Lactate	BY, BU	97	5.54e-47
Lactate	BY, DP	109	6.52e-24
Lactate	BY, BL	96	1.18e-37
Lactate	BY, BA	118	2.08e-48
Lactate	BY, BP	110	6.16e-41
Lactate	BY, CA	112	3.8e-57
Lactate	BY, EL	104	1.11e-50
Lactate	BY, FP	163	2e-72
Lactate	BY, CH	110	2.73e-51
Lactate	BY, AC	145	3.68e-59
Lactate	BY, BH	127	2.58e-53
Lactate	BY, CG	109	6.88e-50
Lactate	BY, ER	160	2.79e-75
Lactate	BY, RI	156	5.05e-71
Lactate	BY, CC	152	4.04e-61
Lactate	BY, DL	97	9.22e-37
Lactate	BY, DF	114	1.93e-55
Lactate	BU	243	1.66e-112
Lactate	BU, DP	115	1.26e-38
Lactate	BU, BL	110	1.31e-53
Lactate	BU, BA	132	2.42e-57
Lactate	BU, BP	117	2.52e-46
Lactate	BU, CA	145	4.7e-69
Lactate	BU, EL	151	3.09e-71
Lactate	BU, FP	183	6.46e-86
Lactate	BU, CH	129	1.63e-58
Lactate	BU, AC	124	1.4e-46
Lactate	BU, BH	130	4.77e-58
Lactate	BU, CG	133	7.31e-66
Lactate	BU, ER	162	1.54e-74
Lactate	BU, RI	184	1.89e-91
Lactate	BU, CC	160	4.27e-68
Lactate	BU, DL	102	7.89e-37
Lactate	BU, DF	145	3.65e-69
Lactate	DP	242	2.27e-64
Lactate	DP, BL	113	1.29e-37
Lactate	DP, BA	122	9.97e-31
Lactate	DP, BP	119	4.83e-21
Lactate	DP, CA	125	1.09e-40
Lactate	DP, EL	119	1.53e-38
Lactate	DP, FP	182	7.68e-49
Lactate	DP, CH	118	3.36e-33
Lactate	DP, AC	132	7.64e-29
Lactate	DP, BH	133	3.78e-35
Lactate	DP, CG	104	4.09e-34
Lactate	DP, ER	172	5.45e-49
Lactate	DP, RI	185	1.4e-56
Lactate	DP, CC	176	2.73e-46
Lactate	DP, DL	109	7.34e-21
Lactate	DP, DF	133	1.96e-42
Lactate	BL	236	2.54e-109
Lactate	BL, BA	126	3.92e-56
Lactate	BL, BP	105	6.81e-41
Lactate	BL, CA	131	7.56e-66
Lactate	BL, EL	130	5.17e-62
Lactate	BL, FP	177	2.02e-83
Lactate	BL, CH	126	1.59e-61
Lactate	BL, AC	150	2.09e-54
Lactate	BL, BH	127	1.78e-57
Lactate	BL, CG	113	9.12e-50
Lactate	BL, ER	160	5.21e-76
Lactate	BL, RI	174	2.13e-83
Lactate	BL, CC	167	2.47e-71
Lactate	BL, DL	91	9.35e-38
Lactate	BL, DF	128	3.2e-60
Lactate	BA	289	9.6e-122
Lactate	BA, BP	149	8.29e-52
Lactate	BA, CA	159	2.9e-72
Lactate	BA, EL	145	5.54e-65
Lactate	BA, FP	223	2.5e-95
Lactate	BA, CH	140	4.53e-61
Lactate	BA, AC	169	1.71e-47
Lactate	BA, BH	140	7.43e-61
Lactate	BA, CG	136	5.59e-58
Lactate	BA, ER	210	1.33e-91
Lactate	BA, RI	218	7.75e-97
Lactate	BA, CC	213	7.93e-87
Lactate	BA, DL	123	5.75e-42
Lactate	BA, DF	174	6.11e-75
Lactate	BP	241	1.39e-93
Lactate	BP, CA	138	4.38e-55
Lactate	BP, EL	127	6.25e-51
Lactate	BP, FP	190	1.46e-70
Lactate	BP, CH	110	3.62e-41
Lactate	BP, AC	149	1.67e-40
Lactate	BP, BH	129	1.76e-50
Lactate	BP, CG	130	1.51e-48
Lactate	BP, ER	185	5.28e-70
Lactate	BP, RI	191	3.45e-72
Lactate	BP, CC	180	4.61e-62
Lactate	BP, DL	116	2.45e-35
Lactate	BP, DF	144	1.15e-57
Lactate	CA	275	2.39e-130
Lactate	CA, EL	153	1.34e-74
Lactate	CA, FP	206	7.27e-97
Lactate	CA, CH	146	1.78e-66
Lactate	CA, AC	155	7.1e-56
Lactate	CA, BH	158	1.7e-77
Lactate	CA, CG	126	1.26e-58
Lactate	CA, ER	199	7.63e-97
Lactate	CA, RI	209	1.79e-104
Lactate	CA, CC	191	3.43e-86
Lactate	CA, DL	106	2.6e-38
Lactate	CA, DF	161	3.54e-77
Lactate	EL	272	1.17e-104
Lactate	EL, FP	209	2.25e-93
Lactate	EL, CH	139	3.4e-65
Lactate	EL, AC	155	8.44e-55
Lactate	EL, BH	143	2.83e-63
Lactate	EL, CG	130	2.92e-59
Lactate	EL, ER	196	1.12e-81
Lactate	EL, RI	204	3.35e-92
Lactate	EL, CC	179	1.99e-75
Lactate	EL, DL	108	3.5e-41
Lactate	EL, DF	155	1.09e-73
Lactate	FP	478	1.62e-196
Lactate	FP, CH	188	2.32e-84
Lactate	FP, AC	283	1.16e-98
Lactate	FP, BH	213	2.13e-96
Lactate	FP, CG	179	6.15e-82
Lactate	FP, ER	363	1.04e-162
Lactate	FP, RI	358	1.1e-157
Lactate	FP, CC	350	4.5e-149
Lactate	FP, DL	158	1.18e-60
Lactate	FP, DF	234	1.8e-104
Lactate	CH	259	1.59e-120
Lactate	CH, AC	157	1.24e-56
Lactate	CH, BH	133	1.69e-63
Lactate	CH, CG	123	1.57e-57
Lactate	CH, ER	175	2.03e-76
Lactate	CH, RI	196	3.62e-91
Lactate	CH, CC	174	3.54e-70
Lactate	CH, DL	97	7.36e-33
Lactate	CH, DF	148	7.83e-67
Lactate	AC	397	9.67e-118
Lactate	AC, BH	168	9.11e-63
Lactate	AC, CG	150	4.09e-53
Lactate	AC, ER	273	2.14e-94
Lactate	AC, RI	277	8.04e-96
Lactate	AC, CC	266	3.08e-82
Lactate	AC, DL	123	3.38e-37
Lactate	AC, DF	173	7.23e-59
Lactate	BH	288	9.1e-131
Lactate	BH, CG	136	2.75e-63
Lactate	BH, ER	201	8.62e-93
Lactate	BH, RI	216	1.33e-100
Lactate	BH, CC	195	6.33e-83
Lactate	BH, DL	112	1.05e-35
Lactate	BH, DF	145	7.65e-65
Lactate	CG	248	1.94e-113
Lactate	CG, ER	171	9.88e-76
Lactate	CG, RI	176	1.43e-76
Lactate	CG, CC	174	1e-68
Lactate	CG, DL	100	3.01e-36
Lactate	CG, DF	133	1.37e-62
Lactate	ER	462	1.56e-193
Lactate	ER, RI	353	2.35e-158
Lactate	ER, CC	346	6.03e-150
Lactate	ER, DL	151	7.68e-60
Lactate	ER, DF	219	1.47e-97
Lactate	RI	469	2.59e-205
Lactate	RI, CC	353	3.52e-149
Lactate	RI, DL	155	3.13e-62
Lactate	RI, DF	223	4.26e-101
Lactate	CC	457	3.15e-188
Lactate	CC, DL	153	5.18e-53
Lactate	CC, DF	216	4.44e-90
Lactate	DL	206	2.78e-79
Lactate	DL, DF	113	1.71e-43
Lactate	DF	291	7.46e-135
Succinate	PC	261	2.44e-68
Succinate	PC, PJ	153	1.08e-34
Succinate	PC, BV	142	5.03e-37
Succinate	PC, BF	104	3.38e-28
Succinate	PC, BO	129	3.17e-35
Succinate	PC, BT	93	2.32e-29
Succinate	PC, BC	113	4.23e-27
Succinate	PC, BY	98	8.29e-26
Succinate	PC, BU	135	1.53e-28
Succinate	PC, DP	116	1.35e-29
Succinate	PC, BL	125	6.79e-35
Succinate	PC, BA	143	9.4e-21
Succinate	PC, BP	126	4.31e-28
Succinate	PC, CA	143	2.98e-35
Succinate	PC, EL	148	6.24e-38
Succinate	PC, FP	215	1.27e-58
Succinate	PC, CH	138	2.15e-35
Succinate	PC, AC	154	4.89e-44
Succinate	PC, BH	143	1.94e-38
Succinate	PC, CG	134	1.32e-38
Succinate	PC, ER	208	1.11e-49
Succinate	PC, RI	216	3.83e-55
Succinate	PC, CC	202	4.92e-42
Succinate	PC, DL	105	1.07e-29
Succinate	PC, DF	152	1.41e-43
Succinate	PJ	284	3.18e-68
Succinate	PJ, BV	139	3.73e-31
Succinate	PJ, BF	105	2.59e-30
Succinate	PJ, BO	137	9.31e-32
Succinate	PJ, BT	91	1.17e-23
Succinate	PJ, BC	126	1.3e-29
Succinate	PJ, BY	127	1.56e-34
Succinate	PJ, BU	144	1.62e-32
Succinate	PJ, DP	134	1.42e-36
Succinate	PJ, BL	130	2.93e-35
Succinate	PJ, BA	155	3.8e-31
Succinate	PJ, BP	134	3.23e-33
Succinate	PJ, CA	154	7.67e-40
Succinate	PJ, EL	141	1.26e-38
Succinate	PJ, FP	221	1.41e-53
Succinate	PJ, CH	144	1.18e-35
Succinate	PJ, AC	171	4.57e-47
Succinate	PJ, BH	164	4.28e-39
Succinate	PJ, CG	129	2.1e-33
Succinate	PJ, ER	204	1.21e-48
Succinate	PJ, RI	214	5.15e-55
Succinate	PJ, CC	204	1.67e-47
Succinate	PJ, DL	108	5.42e-26
Succinate	PJ, DF	152	1.06e-36
Succinate	BV	263	3.88e-58
Succinate	BV, BF	117	7.7e-28
Succinate	BV, BO	116	1.29e-34
Succinate	BV, BT	102	1.06e-27
Succinate	BV, BC	123	3.28e-26
Succinate	BV, BY	106	3.74e-26
Succinate	BV, BU	136	9.02e-35
Succinate	BV, DP	118	3.66e-34
Succinate	BV, BL	105	6.66e-30
Succinate	BV, BA	140	3.06e-17
Succinate	BV, BP	120	4.73e-24
Succinate	BV, CA	138	5.31e-38
Succinate	BV, EL	140	1.86e-34
Succinate	BV, FP	211	3.23e-54
Succinate	BV, CH	132	2.78e-36
Succinate	BV, AC	154	1.5e-40
Succinate	BV, BH	132	4.75e-37
Succinate	BV, CG	127	7.7e-39
Succinate	BV, ER	207	1.16e-36
Succinate	BV, RI	199	2.83e-54
Succinate	BV, CC	186	4.95e-42
Succinate	BV, DL	101	2.06e-22
Succinate	BV, DF	147	4.5e-40
Succinate	BF	205	1.03e-48
Succinate	BF, BO	91	1.77e-31
Succinate	BF, BT	111	6.67e-31
Succinate	BF, BC	117	4.77e-28
Succinate	BF, BY	94	3.34e-31
Succinate	BF, BU	112	1.37e-27
Succinate	BF, DP	104	1.5e-28
Succinate	BF, BL	97	3.27e-29
Succinate	BF, BA	114	1.35e-11
Succinate	BF, BP	92	5.62e-18
Succinate	BF, CA	115	4.15e-36
Succinate	BF, EL	117	5.13e-28
Succinate	BF, FP	139	2.34e-42
Succinate	BF, CH	103	3.47e-30
Succinate	BF, AC	113	2.23e-41
Succinate	BF, BH	107	1.18e-32
Succinate	BF, CG	103	1.06e-34
Succinate	BF, ER	131	8.56e-24
Succinate	BF, RI	141	4.7e-39
Succinate	BF, CC	133	4.28e-31
Succinate	BF, DL	104	6.41e-20
Succinate	BF, DF	106	3.79e-35
Succinate	BO	230	7.8e-66
Succinate	BO, BT	83	2.6e-21
Succinate	BO, BC	100	8.32e-25
Succinate	BO, BY	108	1.64e-28
Succinate	BO, BU	114	2.7e-29
Succinate	BO, DP	106	1.36e-31
Succinate	BO, BL	117	1.25e-31
Succinate	BO, BA	124	1.92e-24
Succinate	BO, BP	123	3.35e-29
Succinate	BO, CA	125	1.51e-34
Succinate	BO, EL	135	1.24e-41
Succinate	BO, FP	177	2.88e-57
Succinate	BO, CH	119	3.89e-35
Succinate	BO, AC	150	3.51e-41
Succinate	BO, BH	135	5.39e-38
Succinate	BO, CG	115	5.82e-35
Succinate	BO, ER	167	3.18e-45
Succinate	BO, RI	179	1.18e-51
Succinate	BO, CC	163	1.24e-38
Succinate	BO, DL	104	6e-25
Succinate	BO, DF	126	2.09e-35
Succinate	BT	183	1.69e-45
Succinate	BT, BC	112	1.56e-23
Succinate	BT, BY	77	1.85e-15
Succinate	BT, BU	94	6.19e-25
Succinate	BT, DP	83	1.19e-23
Succinate	BT, BL	86	2.75e-25
Succinate	BT, BA	102	9.93e-17
Succinate	BT, BP	90	9.69e-16
Succinate	BT, CA	95	3.42e-27
Succinate	BT, EL	94	4.06e-30
Succinate	BT, FP	129	3.21e-39
Succinate	BT, CH	85	1.04e-26
Succinate	BT, AC	105	1.79e-28
Succinate	BT, BH	97	2.13e-31
Succinate	BT, CG	86	5.94e-25
Succinate	BT, ER	123	5.8e-27
Succinate	BT, RI	131	3.77e-35
Succinate	BT, CC	128	1.19e-25
Succinate	BT, DL	94	3.29e-20
Succinate	BT, DF	102	2.08e-25
Succinate	BC	227	4.69e-56
Succinate	BC, BY	111	3.29e-25
Succinate	BC, BU	116	9.31e-26
Succinate	BC, DP	122	1.41e-35
Succinate	BC, BL	100	7.11e-31
Succinate	BC, BA	114	4.19e-17
Succinate	BC, BP	112	4.22e-22
Succinate	BC, CA	116	2.21e-29
Succinate	BC, EL	118	2.58e-32
Succinate	BC, FP	167	1.48e-41
Succinate	BC, CH	114	5.75e-28
Succinate	BC, AC	138	9.17e-39
Succinate	BC, BH	118	2.72e-28
Succinate	BC, CG	108	3.19e-32
Succinate	BC, ER	164	7.87e-35
Succinate	BC, RI	173	3.64e-44
Succinate	BC, CC	150	6.64e-29
Succinate	BC, DL	114	1.34e-25
Succinate	BC, DF	124	1.78e-29
Succinate	BY	224	1.43e-60
Succinate	BY, BU	97	3.38e-26
Succinate	BY, DP	109	2.55e-31
Succinate	BY, BL	96	5.21e-26
Succinate	BY, BA	118	3.09e-30
Succinate	BY, BP	110	1.76e-30
Succinate	BY, CA	112	5.89e-30
Succinate	BY, EL	104	1.31e-30
Succinate	BY, FP	163	1.48e-46
Succinate	BY, CH	110	1.89e-34
Succinate	BY, AC	145	1.95e-43
Succinate	BY, BH	127	5.16e-36
Succinate	BY, CG	109	3.91e-26
Succinate	BY, ER	160	1.84e-42
Succinate	BY, RI	156	3.14e-45
Succinate	BY, CC	152	1.01e-42
Succinate	BY, DL	97	6.64e-28
Succinate	BY, DF	114	1.24e-35
Succinate	BU	243	1.44e-57
Succinate	BU, DP	115	3.8e-28
Succinate	BU, BL	110	3.27e-31
Succinate	BU, BA	132	1.37e-21
Succinate	BU, BP	117	6.22e-24
Succinate	BU, CA	145	4.38e-37
Succinate	BU, EL	151	1.02e-35
Succinate	BU, FP	183	1.72e-45
Succinate	BU, CH	129	1.61e-31
Succinate	BU, AC	124	1.12e-36
Succinate	BU, BH	130	3.29e-34
Succinate	BU, CG	133	3.94e-38
Succinate	BU, ER	162	9.04e-36
Succinate	BU, RI	184	5.65e-44
Succinate	BU, CC	160	1.15e-34
Succinate	BU, DL	102	7.05e-23
Succinate	BU, DF	145	1.06e-33
Succinate	DP	242	9.42e-77
Succinate	DP, BL	113	1.58e-34
Succinate	DP, BA	122	3.72e-24
Succinate	DP, BP	119	1.71e-30
Succinate	DP, CA	125	3.96e-40
Succinate	DP, EL	119	1.96e-33
Succinate	DP, FP	182	1.21e-53
Succinate	DP, CH	118	8.46e-31
Succinate	DP, AC	132	4.52e-50
Succinate	DP, BH	133	1.19e-39
Succinate	DP, CG	104	8.38e-39
Succinate	DP, ER	172	1.48e-50
Succinate	DP, RI	185	1.01e-57
Succinate	DP, CC	176	3.51e-53
Succinate	DP, DL	109	1.28e-27
Succinate	DP, DF	133	8.8e-44
Succinate	BL	236	1.86e-71
Succinate	BL, BA	126	6.49e-22
Succinate	BL, BP	105	6.18e-27
Succinate	BL, CA	131	5.91e-35
Succinate	BL, EL	130	1.2e-41
Succinate	BL, FP	177	4.16e-46
Succinate	BL, CH	126	7.94e-39
Succinate	BL, AC	150	8.98e-45
Succinate	BL, BH	127	3.14e-39
Succinate	BL, CG	113	1.85e-36
Succinate	BL, ER	160	1.29e-46
Succinate	BL, RI	174	1.56e-51
Succinate	BL, CC	167	1.02e-44
Succinate	BL, DL	91	3.49e-21
Succinate	BL, DF	128	2.42e-38
Succinate	BA	289	4.29e-58
Succinate	BA, BP	149	2.99e-36
Succinate	BA, CA	159	4.86e-31
Succinate	BA, EL	145	1.32e-22
Succinate	BA, FP	223	1.79e-51
Succinate	BA, CH	140	5.52e-26
Succinate	BA, AC	169	4.72e-46
Succinate	BA, BH	140	4.45e-28
Succinate	BA, CG	136	5.51e-31
Succinate	BA, ER	210	1.95e-41
Succinate	BA, RI	218	1.33e-55
Succinate	BA, CC	213	2.39e-54
Succinate	BA, DL	123	1.95e-30
Succinate	BA, DF	174	2.64e-45
Succinate	BP	241	4.92e-64
Succinate	BP, CA	138	5.05e-34
Succinate	BP, EL	127	3.92e-29
Succinate	BP, FP	190	1.65e-52
Succinate	BP, CH	110	3.62e-26
Succinate	BP, AC	149	9.85e-55
Succinate	BP, BH	129	1.09e-34
Succinate	BP, CG	130	7.61e-37
Succinate	BP, ER	185	8.73e-53
Succinate	BP, RI	191	8.89e-58
Succinate	BP, CC	180	5.43e-51
Succinate	BP, DL	116	2.47e-31
Succinate	BP, DF	144	7.77e-37
Succinate	CA	275	1.81e-80
Succinate	CA, EL	153	4.68e-48
Succinate	CA, FP	206	3.72e-60
Succinate	CA, CH	146	2.4e-48
Succinate	CA, AC	155	1.66e-46
Succinate	CA, BH	158	2.6e-51
Succinate	CA, CG	126	1.92e-39
Succinate	CA, ER	199	4.31e-52
Succinate	CA, RI	209	1.44e-59
Succinate	CA, CC	191	4.05e-46
Succinate	CA, DL	106	4.61e-28
Succinate	CA, DF	161	1.83e-48
Succinate	EL	272	2.18e-70
Succinate	EL, FP	209	2.44e-63
Succinate	EL, CH	139	9.52e-44
Succinate	EL, AC	155	2.64e-52
Succinate	EL, BH	143	1.4e-47
Succinate	EL, CG	130	1.57e-39
Succinate	EL, ER	196	3.75e-44
Succinate	EL, RI	204	4.39e-60
Succinate	EL, CC	179	4.15e-46
Succinate	EL, DL	108	1.08e-25
Succinate	EL, DF	155	2.69e-44
Succinate	FP	478	8.58e-148
Succinate	FP, CH	188	4.54e-56
Succinate	FP, AC	283	6.86e-86
Succinate	FP, BH	213	2.69e-69
Succinate	FP, CG	179	3.5e-54
Succinate	FP, ER	363	5.01e-104
Succinate	FP, RI	358	4.03e-105
Succinate	FP, CC	350	1.32e-95
Succinate	FP, DL	158	1.82e-42
Succinate	FP, DF	234	1.1e-70
Succinate	CH	259	2.15e-77
Succinate	CH, AC	157	1.85e-52
Succinate	CH, BH	133	9.23e-42
Succinate	CH, CG	123	2.89e-36
Succinate	CH, ER	175	3.85e-47
Succinate	CH, RI	196	2.66e-58
Succinate	CH, CC	174	1.25e-43
Succinate	CH, DL	97	1.1e-22
Succinate	CH, DF	148	2.79e-45
Succinate	AC	397	9.79e-132
Succinate	AC, BH	168	1.86e-54
Succinate	AC, CG	150	5.28e-45
Succinate	AC, ER	273	2.27e-83
Succinate	AC, RI	277	1.58e-81
Succinate	AC, CC	266	5.11e-69
Succinate	AC, DL	123	2.42e-34
Succinate	AC, DF	173	1.2e-58
Succinate	BH	288	1.33e-89
Succinate	BH, CG	136	4.88e-44
Succinate	BH, ER	201	5.93e-55
Succinate	BH, RI	216	1.56e-69
Succinate	BH, CC	195	2.36e-53
Succinate	BH, DL	112	5e-33
Succinate	BH, DF	145	8.35e-51
Succinate	CG	248	7.88e-79
Succinate	CG, ER	171	1.34e-47
Succinate	CG, RI	176	2.94e-55
Succinate	CG, CC	174	3.33e-49
Succinate	CG, DL	100	1.95e-35
Succinate	CG, DF	133	9.55e-37
Succinate	ER	462	1.06e-128
Succinate	ER, RI	353	1.94e-92
Succinate	ER, CC	346	1.42e-92
Succinate	ER, DL	151	1.15e-45
Succinate	ER, DF	219	4.92e-65
Succinate	RI	469	1.62e-149
Succinate	RI, CC	353	1.11e-96
Succinate	RI, DL	155	1.42e-44
Succinate	RI, DF	223	1.68e-70
Succinate	CC	457	3.77e-129
Succinate	CC, DL	153	3.05e-41
Succinate	CC, DF	216	6.12e-60
Succinate	DL	206	6.45e-59
Succinate	DL, DF	113	7.05e-27
Succinate	DF	291	5.74e-91
Figure 4-figure supplement 1 Pearson correlations
Target	% of train data	N	avg. p-value
FP	0.5	380	0.00971
FP	0.6	457	0.013369
FP	0.7	533	3.54e-05
FP	0.8	609	2.82e-05
FP	0.9	685	1.29e-05
FP	1	761	4.58e-06
EL	0.5	380	2.43e-45
EL	0.6	457	2.75e-55
EL	0.7	533	1.87e-70
EL	0.8	609	3.36e-82
EL	0.9	685	1.39e-96
EL	1	761	6.56e-107
DP	0.5	380	4.84e-40
DP	0.6	457	1.93e-59
DP	0.7	533	1.07e-69
DP	0.8	609	8.18e-84
DP	0.9	685	2.98e-117
DP	1	761	2.01e-131
BH	0.5	380	0.141945
BH	0.6	457	0.015203
BH	0.7	533	6.4e-09
BH	0.8	609	6.92e-14
BH	0.9	685	7.39e-52
BH	1	761	2.95e-79
RI	0.5	380	3.08e-07
RI	0.6	457	4.46e-09
RI	0.7	533	1.47e-12
RI	0.8	609	2.33e-08
RI	0.9	685	2.64e-21
RI	1	761	7.7e-28
CH	0.5	380	2.29e-33
CH	0.6	457	9.88e-50
CH	0.7	533	1.48e-60
CH	0.8	609	9.18e-79
CH	0.9	685	1.01e-81
CH	1	761	1.55e-107
BU	0.5	380	1.66e-34
BU	0.6	457	1.9e-66
BU	0.7	533	2.48e-61
BU	0.8	609	2.12e-90
BU	0.9	685	1.12e-108
BU	1	761	2.17e-124
BL	0.5	380	6.78e-10
BL	0.6	457	4.98e-08
BL	0.7	533	2.29e-14
BL	0.8	609	6.43e-59
BL	0.9	685	2.61e-91
BL	1	761	5.81e-172
PJ	0.5	380	6.39e-28
PJ	0.6	457	3.99e-51
PJ	0.7	533	1.86e-41
PJ	0.8	609	1.82e-70
PJ	0.9	685	4.48e-115
PJ	1	761	2.16e-149
CA	0.5	380	2.43e-22
CA	0.6	457	4.37e-32
CA	0.7	533	1.5e-47
CA	0.8	609	9.83e-61
CA	0.9	685	7.98e-82
CA	1	761	6.57e-99
BV	0.5	380	3.68e-51
BV	0.6	457	7.53e-80
BV	0.7	533	8.09e-148
BV	0.8	609	5.59e-132
BV	0.9	685	4.24e-192
BV	1	761	1.76e-243
CG	0.5	380	4.72e-83
CG	0.6	457	4.62e-138
CG	0.7	533	3e-168
CG	0.8	609	4.55e-200
CG	0.9	685	6.56e-246
CG	1	761	1.46e-287
DF	0.5	380	1.59e-91
DF	0.6	457	6.56e-114
DF	0.7	533	2.46e-144
DF	0.8	609	5.12e-161
DF	0.9	685	4.54e-196
DF	1	761	2.42e-230
BY	0.5	380	1.56e-87
BY	0.6	457	8.58e-133
BY	0.7	533	8.78e-153
BY	0.8	609	8.66e-194
BY	0.9	685	4.83e-215
BY	1	761	4.65e-258
ER	0.5	380	1.14e-42
ER	0.6	457	6.41e-66
ER	0.7	533	1.49e-79
ER	0.8	609	1.34e-110
ER	0.9	685	3.79e-120
ER	1	761	3.53e-149
BA	0.5	380	7.46e-61
BA	0.6	457	1.64e-84
BA	0.7	533	6.6e-106
BA	0.8	609	3.82e-121
BA	0.9	685	2.46e-150
BA	1	761	1.77e-184
BO	0.5	380	1.62e-93
BO	0.6	457	2.54e-122
BO	0.7	533	7.11e-144
BO	0.8	609	1.17e-178
BO	0.9	685	2.78e-206
BO	1	761	2.25e-243
BP	0.5	380	3.78e-105
BP	0.6	457	8.39e-139
BP	0.7	533	1.52e-161
BP	0.8	609	9.94e-197
BP	0.9	685	2.38e-217
BP	1	761	1.28e-245
PC	0.5	380	3.87e-59
PC	0.6	457	1.49e-78
PC	0.7	533	1.68e-118
PC	0.8	609	1.03e-143
PC	0.9	685	4.71e-180
PC	1	761	1.76e-223
BF	0.5	380	8.23e-119
BF	0.6	457	1.16e-175
BF	0.7	533	2.24e-211
BF	0.8	609	5.85e-256
BF	0.9	685	1.58e-294
BF	1	761	0
DL	0.5	380	8.97e-74
DL	0.6	457	2.48e-99
DL	0.7	533	4.14e-115
DL	0.8	609	1.37e-145
DL	0.9	685	4.64e-171
DL	1	761	5.82e-206
BT	0.5	380	6.6e-152
BT	0.6	457	4.97e-182
BT	0.7	533	9.29e-230
BT	0.8	609	1.03e-267
BT	0.9	685	2.36e-300
BT	1	761	0
BC	0.5	380	3.02e-144
BC	0.6	457	5.36e-188
BC	0.7	533	1.57e-226
BC	0.8	609	1.32e-273
BC	0.9	685	0
BC	1	761	0
AC	0.5	380	2.95e-96
AC	0.6	457	2.85e-130
AC	0.7	533	2.11e-168
AC	0.8	609	2.14e-211
AC	0.9	685	1.86e-261
AC	1	761	4.87e-295
CC	0.5	380	1.03e-114
CC	0.6	457	3.28e-132
CC	0.7	533	5.52e-169
CC	0.8	609	1.72e-184
CC	0.9	685	5.01e-219
CC	1	761	1.88e-262
